# Supplementary material for: A machine learning model for predicting severe mycoplasma pneumoniae pneumonia in School-Aged children
Source: Research Square preprint supplement (doi:10.21203/rs.3.rs-5491361/v1), 2025-04-04
Supplement: Supplementary file 1 [file 96d0fb69f72eb7aa72ba6e5f.docx]

**Table S2** Biomarkers of the patients

| **Variables** | **NSMPP（n=392）** | **SMPP（n=91）** | **P** **value** |
| --- | --- | --- | --- |
| CRP, mg/L | 7.44 (3.91,15.83) | 25.03 (8.53,49.99) | ＜0.001 |
| WBC, 109/L | 8.09 (6.42,10.77) | 8.44 (6.32,12.50) | 0.393 |
| LY%, % | 26.45 (20.73,32.28) | 16.65 (11.23,25.20) | ＜0.001 |
| NE%, % | 63.80 (56.88,70.40) | 74.70 (65.30,83.28) | ＜0.001 |
| LY, 109/L | 2.15 (1.66,2.77) | 1.40 (1.10,2.00) | ＜0.001 |
| NE, 109/L | 5.10 (4.06,6.84) | 6.63 (4.34,9.37) | ＜0.001 |
| Hgb, g/L | 125.0 (119.0,132.0) | 123.0 (117.0,130.0) | 0.008 |
| Plt, 109/L | 298.0 (241.0,384.0) | 241.0 (196.0,297.8) | ＜0.001 |
| NLR | 2.44 (1.77,3.36) | 4.70 (2.70,7.24) | ＜0.001 |
| PLR | 137.52 (107.44,182.52) | 155.71 (112.99,227.80) | 0.005 |
| TP, g/L | 69.55 (66.70,72.80) | 66.00 (62.10,69.55) | ＜0.001 |
| ALB, g/L | 42.10 (40.70,43.60) | 38.40 (36.38,41.63) | ＜0.001 |
| GLB, g/L | 27.30 (25.4±0,29.60) | 27.20 (24.48,28.80) | 0.362 |
| A:G | 1.54±0.17 | 1.44±0.20 | ＜0.001 |
| ALT, U/L | 14.70 (11.60,19.58) | 20.80 (13.78,50.55) | ＜0.001 |
| AST, U/L | 28.80 (24.05,34.10) | 36.70 (29.78,63.88) | ＜0.001 |
| GGT, U/L | 11.85 (9.40,14.58) | 12.75 (10.10,18.13) | 0.032 |
| UREA, mmol/L | 3.68 (3.05,4.33) | 3.58 (2.86,4.43) | 0.519 |
| CREA, umol/L | 39.30 (34.40,44.80) | 40.95 (35.45,46.63) | 0.158 |
| UA, umol/L | 235.60 (198.70,279.63) | 189.90 (151.35,235.00) | ＜0.001 |
| LDH, U/L | 305.65 (261.48,363.93) | 449.95 (334.58,682.78) | ＜0.001 |
| HBDH, U/L | 236.50 (205.25,279.00) | 333.50 (247.50,494.75) | ＜0.001 |
| CK, U/L | 79.20 (57.85,115.73) | 97.15 (67.10,197.93) | 0.001 |
| TCHOL, mmol/L | 3.90 (3.50,4.37) | 3.84 (3.40,4.33) | 0.598 |
| TG, mmol/L | 0.93 (0.73,1.23) | 1.16 (0.92,1.48) | ＜0.001 |
| CG, mmol/L | 1.91 (1.53,2.46) | 1.95 (1.50,2.65) | 0.785 |
| PA, mg/L | 118.00 (97.25,150.75) | 94.50 (79.00,127.50) | ＜0.001 |
| C3, g/L | 1.26 (1.12,1.40) | 1.17 (1.07,1.33) | 0.004 |
| C4, g/L | 0.40 (0.31,0.47) | 0.33 (0.25,0.45) | 0.002 |
| IgA, g/L | 1.61 (1.19,2.09) | 1.60 (1.13,1.98) | 0.286 |
| IgG, g/L | 9.56 (8.09,10.94) | 9.18 (7.81,10.92) | 0.488 |
| IgM, g/L | 1.36 (1.08,1.77) | 1.25 (1.00,1.69) | 0.238 |
| PT, s | 13.20 (12.80,13.70) | 13.80(13.17,14.10) | ＜0.001 |
| APTT, s | 37.95 (34.50,41.90) | 37.30(31.73,40.70) | 0.016 |
| Fib, g/L | 4.71 (4.11,5.16) | 4.83(4.24,5.43) | 0.151 |
| DD-PLUS, ug/L | 510.00 (370.00,770.00) | 1495.00(945.00,4110.00) | ＜0.001 |
| CD3+%, % | 69.19 (62.54,74.68) | 66.93(56.39,73.78) | 0.018 |
| CD3+CD4+%, % | 36.74 (30.97,42.24) | 31.81(26.76,41.47) | 0.004 |
| CD3+CD8+%, % | 26.12 (21.95,30.44) | 26.21(22.75,32.20) | 0.338 |
| CD4+/CD8+%, % | 1.41 (1.09,1.73) | 1.19 (0.91,1.74) | 0.017 |
| CD3-CD19+%, % | 17.17 (13.19,21.74) | 20.05 (13.44,30.15) | 0.001 |
| CD3-CD(16+56)+%, % | 10.91 (7.25,15.58) | 9.27 (6.52,15.53) | 0.095 |
| CD19+CD23+%, % | 5.45 (3.56,8.25) | 3.69 (2.15,6.41) | ＜0.001 |
| CD3+,106/L | 1175.92 (811.74,1585.36) | 736.16 (450.00,1051.46) | ＜0.001 |
| CD3+CD4+, 106/L | 623.57 (407.79,868.49) | 376.10 (217.98,524.65) | ＜0.001 |
| CD3+CD8+, 106/L | 432.71 (298.76,600.45) | 282.63 (180.08,437.44) | ＜0.001 |
| CD3-CD19+, 106/L | 275.74 (184.19,419.84) | 236.43 (138.09,318.27) | 0.002 |
| NK, 106/L | 178.09 (107.97,275.04) | 94.18 (51.18,195.14) | ＜0.001 |
| CKMB, ng/mL | 1.00 (0.70,1.50) | 0.88 (0.60,1.20) | 0.024 |
| Hs-cTnT, pg/mL | 1.50 (1.50,4.21) | 3.19 (1.50,4.52) | 0.103 |
| Myo, ng/mL | 15.00 (15.00,15.00) | 15.00 (15.00,27.83) | ＜0.001 |

Normal distribution variables: n (
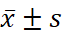
); Non-normal distribution variables: (M [P25, P75]); Categorical variables: (n [%])
