# Supplementary material for: A machine learning model for predicting severe mycoplasma pneumoniae pneumonia in School-Aged children
Source: Research Square preprint supplement (doi:10.21203/rs.3.rs-5491361/v1), 2025-04-04
Supplement: Supplementary file 2 [file a182f16d5f4f422f43c704f2.docx]

**Table S1** Clinical characteristics of the patients

| **Variables** | **NSMPP（n=392）** | **SMPP（n=91）** | **P value** |
| --- | --- | --- | --- |
| Fever days | 6.00 (5.00,8.00) | 10.00 (7.00,12.00) | ＜0.001 |
| Cough | 390 (99.5%) | 91 (100%) | 1.000 |
| Emesis | 78 (19.9%) | 19 (20.9%) | 0.833 |
| Diarrhoea | 8 (2.0%) | 1 (1.1%) | 0.866 |
| Stomachache | 30 (7.7%) | 11 (12.1%) | 0.171 |
| Headache | 18 (4.6%) | 6 (6.6%) | 0.600 |
| Skin rash | 10 (2.6%) | 1 (1.1%) | 0.655 |
| Nasal obstruction or rhinorrhoea | 89 (22.7%) | 22 (24.2%) | 0.764 |
| Pharyngodynia | 20 (5.1%) | 8 (8.8%) | 0.175 |
| anorexia | 137 (34.9%) | 49 (53.8%) | 0.001 |
| Hypersensitivity disease | 180 (45.9%) | 45 (49.5%) | 0.543 |
| Sensibilisin | 44 (11.2%) | 14 (15.4%) | 0.271 |
| Allergy | 197 (50.3%) | 48 (52.7%) | 0.668 |
| Co-viral infection | 109 (27.8%) | 23 (25.3%) | 0.625 |
| Co-bacterial infection | 40 (10.2%) | 4 (4.4%) | 0.083 |
| mixed infection | 162 (41.3%) | 39 (42.9%) | 0.790 |
| Pleural effusion | 17 (4.3%) | 32 (35.2%) | ＜0.001 |
| Pulmonary consolidation | 59 (15.1%) | 35 (38.5%) | ＜0.001 |
| pulmonary hypotension | 10 (2.6%) | 24 (26.4%) | ＜0.001 |
| electronic bronchoscope | 155 (39.5%) | 82 (90.1%) | ＜0.001 |
| Hospital stay | 8.00(7.00,9.00) | 13.00(10.00,15.25) | ＜0.001 |

Normal distribution variables: n (
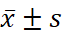
); Non-normal distribution variables: (M [P25, P75]); Categorical variables: (n [%])
