# Supplementary material for: A machine learning model for predicting severe mycoplasma pneumoniae pneumonia in School-Aged children
Source: Research Square preprint supplement (doi:10.21203/rs.3.rs-5491361/v1), 2025-04-04
Supplement: Supplementary file 3 [file a892336637ab8a17e618f70f.docx]

**Table S3** Univariate logistic regression of SMPP Study

| **Variables** | **OR** | **95%CI** | **P value** |
| --- | --- | --- | --- |
| CRP, mg/L | 1.055 | (1.040-1.071) | ＜0.001 |
| LY%, % | 0.897 | (0.870-0.924) | ＜0.001 |
| NE%, % | 1.093 | (1.067-1.120) | ＜0.001 |
| LY, 109/L | 0.409 | (0.297-0.564) | ＜0.001 |
| NE, 109/L | 1.149 | (1.073-1.231) | ＜0.001 |
| Hgb, g/L | 0.968 | (0.945-0.992) | 0.008 |
| Plt, 109/L | 0.992 | (0.990-0.995) | ＜0.001 |
| NLR | 1.454 | (1.316-1.606) | ＜0.001 |
| PLR | 1.004 | (1.002-1.006) | ＜0.001 |
| TP, g/L | 0.857 | (0.813-0.904) | ＜0.001 |
| ALB, g/L | 0.694 | (0.634-0.761) | ＜0.001 |
| A:G | 0.035 | (0.009-0.135) | ＜0.001 |
| ALT, U/L | 1.047 | (1.031-1.064) | ＜0.001 |
| AST, U/L | 1.071 | (1.049-1.094) | ＜0.001 |
| GGT, U/L | 1.059 | (1.023-1.096) | 0.001 |
| UA, umol/L | 0.986 | (0.981-0.990) | ＜0.001 |
| LDH, U/L | 1.010 | (1.007-1.012) | ＜0.001 |
| HBDH, U/L | 1.013 | (1.010-1.016) | ＜0.001 |
| CK, U/L | 1.004 | (1.002-1.007) | ＜0.001 |
| TG, mmol/L | 1.907 | (1.323-2.751) | ＜0.001 |
| PA, mg/L | 0.988 | (0.981-0.994) | ＜0.001 |
| C3, g/L | 0.406 | (0.179-0.917) | 0.030 |
| C4, g/L | 0.244 | (0.066-0.904) | 0.035 |
| PT, s | 2.191 | (1.589-3.023) | ＜0.001 |
| APTT, s | 0.954 | (0.914-0.995) | 0.030 |
| DD-PLUS, ug/L | 1.001 | (1.001-1.002) | ＜0.001 |
| CD3+%, % | 0.965 | (0.943-0.988) | 0.002 |
| CD3+CD4+%, % | 0.965 | (0.939-0.990) | 0.008 |
| CD4+/CD8+%, % | 1.070 | (0.919-1.245) | 0.382 |
| CD3-CD19+%, % | 1.066 | (1.036-1.097) | ＜0.001 |
| CD19+CD23+%, % | 0.930 | (0.869-0.995) | 0.036 |
| CD3+, 106/L | 0.999 | (0.998-0.999) | ＜0.001 |
| CD3+CD4+, 106/L | 0.998 | (0.997-0.999) | ＜0.001 |
| CD3+CD8+, 106/L | 0.997 | (0.996-0.998) | ＜0.001 |
| CD3-CD19+, 106/L | 0.998 | (0.996-0.999) | 0.002 |
| NK, 106/L | 0.997 | (0.996-0.999) | 0.007 |
| CKMB, ng/mL | 0.968 | (0.734-1.276) | 0.816 |
| Myo, ng/mL | 1.052 | (1.028-1.076) | ＜0.001 |
| anorexia | 2.172 | (1.369-3.445) | ＜0.001 |
| Fever days | 1.748 | (1.541-1.984) | ＜0.001 |
| Pleural effusion | 11.964 | (6.251-22.898) | ＜0.001 |

Abbreviations: CI Confidence interval, OR Odds ratio
