# Supplementary material for: A machine learning model for predicting severe mycoplasma pneumoniae pneumonia in School-Aged children
Source: Research Square preprint supplement (doi:10.21203/rs.3.rs-5491361/v1), 2025-04-04
Supplement: Supplementary file 4 [file d59699457f5ca675b67890a5.docx]

**Table S4:** Five-fold stratified cross-validation performance metrics

| **Model** | **Accuracy（%）** | **Sensitivity（%）** | **Specificity（%）** | **F1-Score** |
| --- | --- | --- | --- | --- |
| LR | 0.90(0.85-0.97) | 0.72(0.29-1.00) | 0.96(0.91-1.00) | 0.78(0.40-0.92) |
| SVM | 0.84(0.79-0.92) | 0.36(0.17-0.50) | 1.00(0.97-1.00) | 0.53(0.29-0.73) |
| DT | 0.88(0.82-1.00) | 0.60(0.43-1.00) | 0.97(0.84-1.00) | 0.71(0.44-1.00) |
| RF | 0.86(0.85-0.95) | 0.44(0.14-0.67) | 1.00(0.97-1.00) | 0.61(0.29-0.80) |
| GBDT | 0.88(0.82-0.97) | 0.52(0.14-0.86) | 1.00(0.97-1.00) | 0.68(0.22-0.92) |
| CatBoost | 0.92(0.90-0.95) | 0.72(0.57-0.83) | 0.99(0.97-1.00) | 0.82(0.67-0.83) |
| LightGBM | 0.86(0.77-0.97) | 0.48(0.33-0.85) | 0.99(0.94-1.00) | 0.63(0.25-0.92) |
| XGBoost | 0.84(0.84-0.92) | 0.40(0.14-0.57) | 0.99(0.97-1.00) | 0.56(0.25-0.73) |
